# Supplementary material for: Functional diversity of PFKFB3 splice variants in glioblastomas
Source: PubMed Central journal article supplement (PMC8263283; doi:10.1371/journal.pone.0241092), 2021-07-07
Supplement: pone.0241092.s013.pdf [file pone.0241092.s013.pdf]

**S1 Table. Summraizes tumor and control samples.**

| Pat.-No.    | WHO | Age/Gender | IDH-1    | IDH-2    |
|-------------|-----|------------|----------|----------|
| <b>5</b>    | NN  | 57/f       | wildtype | wildtype |
| <b>8</b>    | NN  | 50/m       | wildtype | wildtype |
| <b>14</b>   | NN  | 30/m       |          |          |
| <b>15</b>   | NN  | 30/m       |          |          |
| <b>32</b>   | NN  | 27/m       |          |          |
| <b>34</b>   | NN  | 46/m       |          |          |
| <b>35</b>   | NN  | 40/m       |          |          |
| <b>80</b>   | NN  | 73/f       | wildtype | wildtype |
| <b>92</b>   | NN  | 49/f       |          |          |
| <b>117</b>  | NN  | 46/m       |          |          |
| <b>P3</b>   | NN  | 55/m       |          |          |
| <b>P15</b>  | NN  | 49/f       |          |          |
| <b>206</b>  | NN  | 52/f       | wildtype | wildtype |
| <b>P104</b> | NN  | 64/f       | wildtype | wildtype |
| <b>326</b>  | NN  | 62/f       | wildtype | wildtype |
| <b>230</b>  | IV  | 35/f       | wildtype | wildtype |
| <b>261</b>  | IV  | 66/m       | wildtype | wildtype |
| <b>266</b>  | IV  | 67/m       | wildtype | wildtype |
| <b>307</b>  | IV  | 62/f       | wildtype | wildtype |
| <b>309</b>  | IV  | 73/m       | wildtype | wildtype |
| <b>310</b>  | IV  | 56/m       | wildtype | wildtype |

|            |    |      |          |          |
|------------|----|------|----------|----------|
| <b>313</b> | IV | 72/m | wildtype | wildtype |
| <b>317</b> | IV | 78/f | wildtype | wildtype |
| <b>322</b> | IV | 58/m | wildtype | wildtype |
| <b>353</b> | IV | 57/m | wildtype | wildtype |
| <b>356</b> | IV | 69/f | wildtype | wildtype |
| <b>357</b> | IV | 51/f | wildtype | wildtype |
| <b>359</b> | IV | 75/m | wildtype | wildtype |
| <b>317</b> | IV | 78/f | wildtype | wildtype |
| <b>322</b> | IV | 58/m | wildtype | wildtype |
| <b>353</b> | IV | 57/m | wildtype | wildtype |
| <b>356</b> | IV | 69/f | wildtype | wildtype |
| <b>357</b> | IV | 51/f | wildtype | wildtype |
| <b>359</b> | IV | 75/m | wildtype | wildtype |
| <b>359</b> | IV | 75/m | wildtype | wildtype |
| <b>429</b> | IV | 46/m | wildtype | wildtype |
| <b>435</b> | IV | 45/f | wildtype | wildtype |
| <b>439</b> | IV | 42/m | wildtype | wildtype |
| <b>441</b> | IV | 72/f | wildtype | wildtype |
| <b>443</b> | IV | 68/m | wildtype | wildtype |
| <b>444</b> | IV | 62/f | wildtype | wildtype |
| <b>448</b> | IV | 64/m | wildtype | wildtype |
| <b>466</b> | IV | 63/f | wildtype | wildtype |
| <b>448</b> | IV | 64/m | wildtype | wildtype |
| <b>466</b> | IV | 63/f | wildtype | wildtype |
