# Supplementary material for: Functional diversity of PFKFB3 splice variants in glioblastomas
Source: PubMed Central journal article supplement (PMC8263283; doi:10.1371/journal.pone.0241092), 2021-07-07
Supplement: pone.0241092.s014.pdf [file pone.0241092.s014.pdf]

**S2 Table. Lists primers and oligonucleotides used.**

| Name                                       | Sequence (5'-3')                                                    |
|--------------------------------------------|---------------------------------------------------------------------|
| <i>Genotyping</i>                          |                                                                     |
| IDH1f                                      | CGGTCTTCAGAGAAGCCATT                                                |
| IDH1r                                      | GCAAAATCACATTATTGCCAAC                                              |
| IDH2f                                      | CCAATGGAACTATCCGGAAC                                                |
| IDH2r                                      | TGTGGCCTTGTACTGCAGAG                                                |
| <i>Plasmid construction shRNA</i>          |                                                                     |
| shPFKFB3-<br>4/5 sense                     | GATCCCGCCTGTCTAACATGAAAGGTTCAAGAGACCTTTCATGTTA<br>GACAGGCTTTTTGGAAA |
| shPFKFB3-<br>4/5 antisense                 | AGCTTTTCCAAAAAGCCTGTCTAACATGAAAGGTCTCTTGAACCTT<br>TCATGTTAGACAGGCGG |
| scr sense                                  | GATCCCAGTACTGCTTACGATACGGTTCAAGAGACCGTATCGTAAG<br>CAGTACTTTTTTGGAAA |
| scr antisense                              | AGCTTTTCCAAAAAAGTACTGCTTACGATACGGTCTCTTGAACCGT<br>ATCGTAAGCAGTACTGG |
| <i>Plasmid construction overexpression</i> |                                                                     |
| PFKFB3-4 f                                 | TGGGCCCAAGATGCCGTTGGAAGTACTGACGCAGAG                                |
| PFKFB3-4 r                                 | ATACTTAAGTCATGTTAGACAGGCTTGCC                                       |
| PFKFB3-5 f                                 | ACTTAAGCTTATGCCCTTCAGGAAA                                           |
| PFKFB3-5 r                                 | TAGCTCTAGATCATGTTAGACAGGCTTG                                        |
| <i>qPCR</i>                                |                                                                     |
| 3PFK2fo2                                   | GAGACGCAATAGTGTCAC                                                  |
| iPFK2re6                                   | GGAGCCTTTCATGTTAGAC                                                 |

|                      |                         |
|----------------------|-------------------------|
| TBPfo                | TTCCACTCACAGACTCTCAC    |
| TBPre                | GCTCTCTTATCCTCATGATTACC |
| iPFK2fo              | ACACCGGGAGAGGTCAGAGGATG |
| iPFK2re              | CTACGGGAGCCTTTCATGTTTTG |
| HB10                 | GAATGTGCTGGTCATCTGCC    |
| 6PFK32re5            | GAGCCTTTCATGTTCTCTG     |
| <i>Multiplex PCR</i> |                         |
| 4_Fo                 | ATGCCGTTGGAACTGACGCAG   |
| 5_Fo                 | GCGCGATGCCCTTCAGGAAAG   |
| 4+5-Re               | ACAGGCTTGCCCTAGCAAAGG   |
