# Supplementary material for: Functional diversity of PFKFB3 splice variants in glioblastomas
Source: PubMed Central journal article supplement (PMC8263283; doi:10.1371/journal.pone.0241092), 2021-07-07
Supplement: pone.0241092.s015.pdf [file pone.0241092.s015.pdf]

**S3 Table. This table shows siRNAs used.**

| Name                       | Sequence (5'-3')    |
|----------------------------|---------------------|
| scr-siRNA sense            | UGGUUUACAUGUCGACUAA |
| scr-siRNA antisense        | UUAGUCGACAUGUAAACCA |
| PFKFB3-4/5 siRNA-sense     | GGGCAAGCCUGUCUAACAU |
| PFKFB3-4/5 siRNA-antisense | AUGUUAGACAGGCUUGCCC |
